# Supplementary material
Source: publisher figshare collection journal article supplement (https://rs.figshare.com/ndownloader/files/14661734)
Supplement: Supplementary file 1 [file 14661734]

## Sheet: Shehreen et al 2018 S7 ARG_ACR
AB	SPECIES	GENOMES	ARG	ACR	BOTH ACR & ARG	EXP (ARG and Acr)	OBS (ARG and Acr) +PSC	EXP (ARG and Acr) +PSC	OE	LOG_OE	LOG_OE_CAT	QTL_005	QTL_995	SIG	GENOME with ACR (%)
Aminoglycoside	Pseudomonas aeruginosa	2021	1921	924	920	878.28	920	878.28	1.0475	0.0464082	(0.01,0.5]	0.0337149	0.0596205	Assoc.	45.7199
Beta_lactam	Pseudomonas aeruginosa	2021	1922	924	919	878.737	919	878.737	1.04582	0.0448002	(0.01,0.5]	0.0319294	0.0585025	Assoc.	45.7199
colistin	Pseudomonas aeruginosa	2021	1	924	1	0.457199	1	0.4572	2.18723	0.782634	(0.5,1.0]	0	0.840558	No Assoc.	45.7199
fosfomycin	Pseudomonas aeruginosa	2021	1914	924	916	875.08	916	875.08	1.04676	0.0457014	(0.01,0.5]	0.0319993	0.0593966	Assoc.	45.7199
fusidicacid	Pseudomonas aeruginosa	2021	0	924	0	0	1e-06	1e-06	1	0	(-0.01,0.01]	0	0	No Assoc.	45.7199
glycopeptid	Pseudomonas aeruginosa	2021	0	924	0	0	1e-06	1e-06	1	0	(-0.01,0.01]	0	0	No Assoc.	45.7199
macrolide	Pseudomonas aeruginosa	2021	22	924	1	10.0584	1	10.0584	0.0994196	-2.30841	Less than -1.0	-16.4681	-0.783011	Assoc.	45.7199
nitroimidazole	Pseudomonas aeruginosa	2021	0	924	0	0	1e-06	1e-06	1	0	(-0.01,0.01]	0	0	No Assoc.	45.7199
oxazolidinone	Pseudomonas aeruginosa	2021	0	924	0	0	1e-06	1e-06	1	0	(-0.01,0.01]	0	0	No Assoc.	45.7199
oxazolidinone_phenicol	Pseudomonas aeruginosa	2021	0	924	0	0	1e-06	1e-06	1	0	(-0.01,0.01]	0	0	No Assoc.	45.7199
phenicol	Pseudomonas aeruginosa	2021	1892	924	898	865.021	898	865.021	1.03812	0.037416	(0.01,0.5]	0.0216087	0.053637	Assoc.	45.7199
quinolone	Pseudomonas aeruginosa	2021	9	924	3	4.11479	3	4.1148	0.729077	-0.315977	(-0.5,-0.01]	-15.1859	0.59925	No Assoc.	45.7199
rifampicin	Pseudomonas aeruginosa	2021	18	924	11	8.22959	11	8.22959	1.33664	0.290159	(0.01,0.5]	-0.436834	0.698207	No Assoc.	45.7199
sulphonamide	Pseudomonas aeruginosa	2021	528	924	265	241.401	265	241.401	1.09776	0.0932692	(0.01,0.5]	-0.0112188	0.185269	No Assoc.	45.7199
tetracycline	Pseudomonas aeruginosa	2021	91	924	35	41.6051	35	41.6051	0.841242	-0.172876	(-0.5,-0.01]	-0.595478	0.123408	No Assoc.	45.7199
trimethoprim	Pseudomonas aeruginosa	2021	72	924	14	32.9184	14	32.9184	0.425295	-0.854973	(-1.0,-0.5]	-1.73402	-0.371863	Assoc.	45.7199
Aminoglycoside	Listeria monocytogenes	1377	1	368	0	0.267248	1e-06	0.267249	3.74183e-06	-12.4959	Less than -1.0	-13.9196	0	No Assoc.	26.7248
Beta_lactam	Listeria monocytogenes	1377	1	368	0	0.267248	1e-06	0.267249	3.74183e-06	-12.4959	Less than -1.0	-14.0408	0	No Assoc.	26.7248
colistin	Listeria monocytogenes	1377	0	368	0	0	1e-06	1e-06	1	0	(-0.01,0.01]	0	0	No Assoc.	26.7248
fosfomycin	Listeria monocytogenes	1377	1354	368	364	361.853	364	361.853	1.00593	0.00591497	(-0.01,0.01]	-0.00778745	0.0178883	No Assoc.	26.7248
fusidicacid	Listeria monocytogenes	1377	0	368	0	0	1e-06	1e-06	1	0	(-0.01,0.01]	0	0	No Assoc.	26.7248
glycopeptid	Listeria monocytogenes	1377	0	368	0	0	1e-06	1e-06	1	0	(-0.01,0.01]	0	0	No Assoc.	26.7248
macrolide	Listeria monocytogenes	1377	3	368	0	0.801743	1e-06	0.801744	1.24728e-06	-13.5945	Less than -1.0	-14.6048	0	No Assoc.	26.7248
nitroimidazole	Listeria monocytogenes	1377	0	368	0	0	1e-06	1e-06	1	0	(-0.01,0.01]	0	0	No Assoc.	26.7248
oxazolidinone	Listeria monocytogenes	1377	0	368	0	0	1e-06	1e-06	1	0	(-0.01,0.01]	0	0	No Assoc.	26.7248
oxazolidinone_phenicol	Listeria monocytogenes	1377	0	368	0	0	1e-06	1e-06	1	0	(-0.01,0.01]	0	0	No Assoc.	26.7248
phenicol	Listeria monocytogenes	1377	0	368	0	0	1e-06	1e-06	1	0	(-0.01,0.01]	0	0	No Assoc.	26.7248
quinolone	Listeria monocytogenes	1377	0	368	0	0	1e-06	1e-06	1	0	(-0.01,0.01]	0	0	No Assoc.	26.7248
rifampicin	Listeria monocytogenes	1377	0	368	0	0	1e-06	1e-06	1	0	(-0.01,0.01]	0	0	No Assoc.	26.7248
sulphonamide	Listeria monocytogenes	1377	0	368	0	0	1e-06	1e-06	1	0	(-0.01,0.01]	0	0	No Assoc.	26.7248
tetracycline	Listeria monocytogenes	1377	18	368	7	4.81046	7	4.81046	1.45516	0.375118	(0.01,0.5]	-0.981652	0.990316	No Assoc.	26.7248
trimethoprim	Listeria monocytogenes	1377	0	368	0	0	1e-06	1e-06	1	0	(-0.01,0.01]	0	0	No Assoc.	26.7248
Aminoglycoside	Neisseria meningitidis	845	0	38	0	0	1e-06	1e-06	1	0	(-0.01,0.01]	0	0	No Assoc.	4.49704
Beta_lactam	Neisseria meningitidis	845	38	38	0	1.70888	1e-06	1.70888	5.8518e-07	-14.3513	Less than -1.0	-14.8531	-13.7016	Assoc.	4.49704
colistin	Neisseria meningitidis	845	0	38	0	0	1e-06	1e-06	1	0	(-0.01,0.01]	0	0	No Assoc.	4.49704
fosfomycin	Neisseria meningitidis	845	0	38	0	0	1e-06	1e-06	1	0	(-0.01,0.01]	0	0	No Assoc.	4.49704
fusidicacid	Neisseria meningitidis	845	0	38	0	0	1e-06	1e-06	1	0	(-0.01,0.01]	0	0	No Assoc.	4.49704
glycopeptid	Neisseria meningitidis	845	0	38	0	0	1e-06	1e-06	1	0	(-0.01,0.01]	0	0	No Assoc.	4.49704
macrolide	Neisseria meningitidis	845	1	38	0	0.0449704	1e-06	0.0449714	2.22363e-05	-10.7138	Less than -1.0	-12.2691	0	No Assoc.	4.49704
nitroimidazole	Neisseria meningitidis	845	0	38	0	0	1e-06	1e-06	1	0	(-0.01,0.01]	0	0	No Assoc.	4.49704
oxazolidinone	Neisseria meningitidis	845	0	38	0	0	1e-06	1e-06	1	0	(-0.01,0.01]	0	0	No Assoc.	4.49704
oxazolidinone_phenicol	Neisseria meningitidis	845	0	38	0	0	1e-06	1e-06	1	0	(-0.01,0.01]	0	0	No Assoc.	4.49704
phenicol	Neisseria meningitidis	845	0	38	0	0	1e-06	1e-06	1	0	(-0.01,0.01]	0	0	No Assoc.	4.49704
quinolone	Neisseria meningitidis	845	0	38	0	0	1e-06	1e-06	1	0	(-0.01,0.01]	0	0	No Assoc.	4.49704
rifampicin	Neisseria meningitidis	845	0	38	0	0	1e-06	1e-06	1	0	(-0.01,0.01]	0	0	No Assoc.	4.49704
sulphonamide	Neisseria meningitidis	845	0	38	0	0	1e-06	1e-06	1	0	(-0.01,0.01]	0	0	No Assoc.	4.49704
tetracycline	Neisseria meningitidis	845	120	38	1	5.39645	1	5.39645	0.185307	-1.68574	Less than -1.0	-15.82	-0.261909	Assoc.	4.49704
trimethoprim	Neisseria meningitidis	845	0	38	0	0	1e-06	1e-06	1	0	(-0.01,0.01]	0	0	No Assoc.	4.49704
Aminoglycoside	Ralstonia solanacearum	70	0	62	0	0	1e-06	1e-06	1	0	(-0.01,0.01]	0	0	No Assoc.	88.5714
Beta_lactam	Ralstonia solanacearum	70	0	62	0	0	1e-06	1e-06	1	0	(-0.01,0.01]	0	0	No Assoc.	88.5714
colistin	Ralstonia solanacearum	70	0	62	0	0	1e-06	1e-06	1	0	(-0.01,0.01]	0	0	No Assoc.	88.5714
fosfomycin	Ralstonia solanacearum	70	0	62	0	0	1e-06	1e-06	1	0	(-0.01,0.01]	0	0	No Assoc.	88.5714
fusidicacid	Ralstonia solanacearum	70	0	62	0	0	1e-06	1e-06	1	0	(-0.01,0.01]	0	0	No Assoc.	88.5714
glycopeptid	Ralstonia solanacearum	70	0	62	0	0	1e-06	1e-06	1	0	(-0.01,0.01]	0	0	No Assoc.	88.5714
macrolide	Ralstonia solanacearum	70	0	62	0	0	1e-06	1e-06	1	0	(-0.01,0.01]	0	0	No Assoc.	88.5714
nitroimidazole	Ralstonia solanacearum	70	0	62	0	0	1e-06	1e-06	1	0	(-0.01,0.01]	0	0	No Assoc.	88.5714
oxazolidinone	Ralstonia solanacearum	70	0	62	0	0	1e-06	1e-06	1	0	(-0.01,0.01]	0	0	No Assoc.	88.5714
oxazolidinone_phenicol	Ralstonia solanacearum	70	0	62	0	0	1e-06	1e-06	1	0	(-0.01,0.01]	0	0	No Assoc.	88.5714
phenicol	Ralstonia solanacearum	70	0	62	0	0	1e-06	1e-06	1	0	(-0.01,0.01]	0	0	No Assoc.	88.5714
quinolone	Ralstonia solanacearum	70	0	62	0	0	1e-06	1e-06	1	0	(-0.01,0.01]	0	0	No Assoc.	88.5714
rifampicin	Ralstonia solanacearum	70	0	62	0	0	1e-06	1e-06	1	0	(-0.01,0.01]	0	0	No Assoc.	88.5714
sulphonamide	Ralstonia solanacearum	70	0	62	0	0	1e-06	1e-06	1	0	(-0.01,0.01]	0	0	No Assoc.	88.5714
tetracycline	Ralstonia solanacearum	70	0	62	0	0	1e-06	1e-06	1	0	(-0.01,0.01]	0	0	No Assoc.	88.5714
trimethoprim	Ralstonia solanacearum	70	0	62	0	0	1e-06	1e-06	1	0	(-0.01,0.01]	0	0	No Assoc.	88.5714
